# Supplementary material for: The SIMULATE ureteroscopy training curriculum: educational value and transfer of skills
Source: Springer Nature journal article supplement (doi:10.1007/s00345-021-03604-w), 2021-02-03

**Supplementary Figure:** Content validity survey results of all the utilised training modalities (Likert scale 1-5). Abbreviations: UO- ureteric orifice

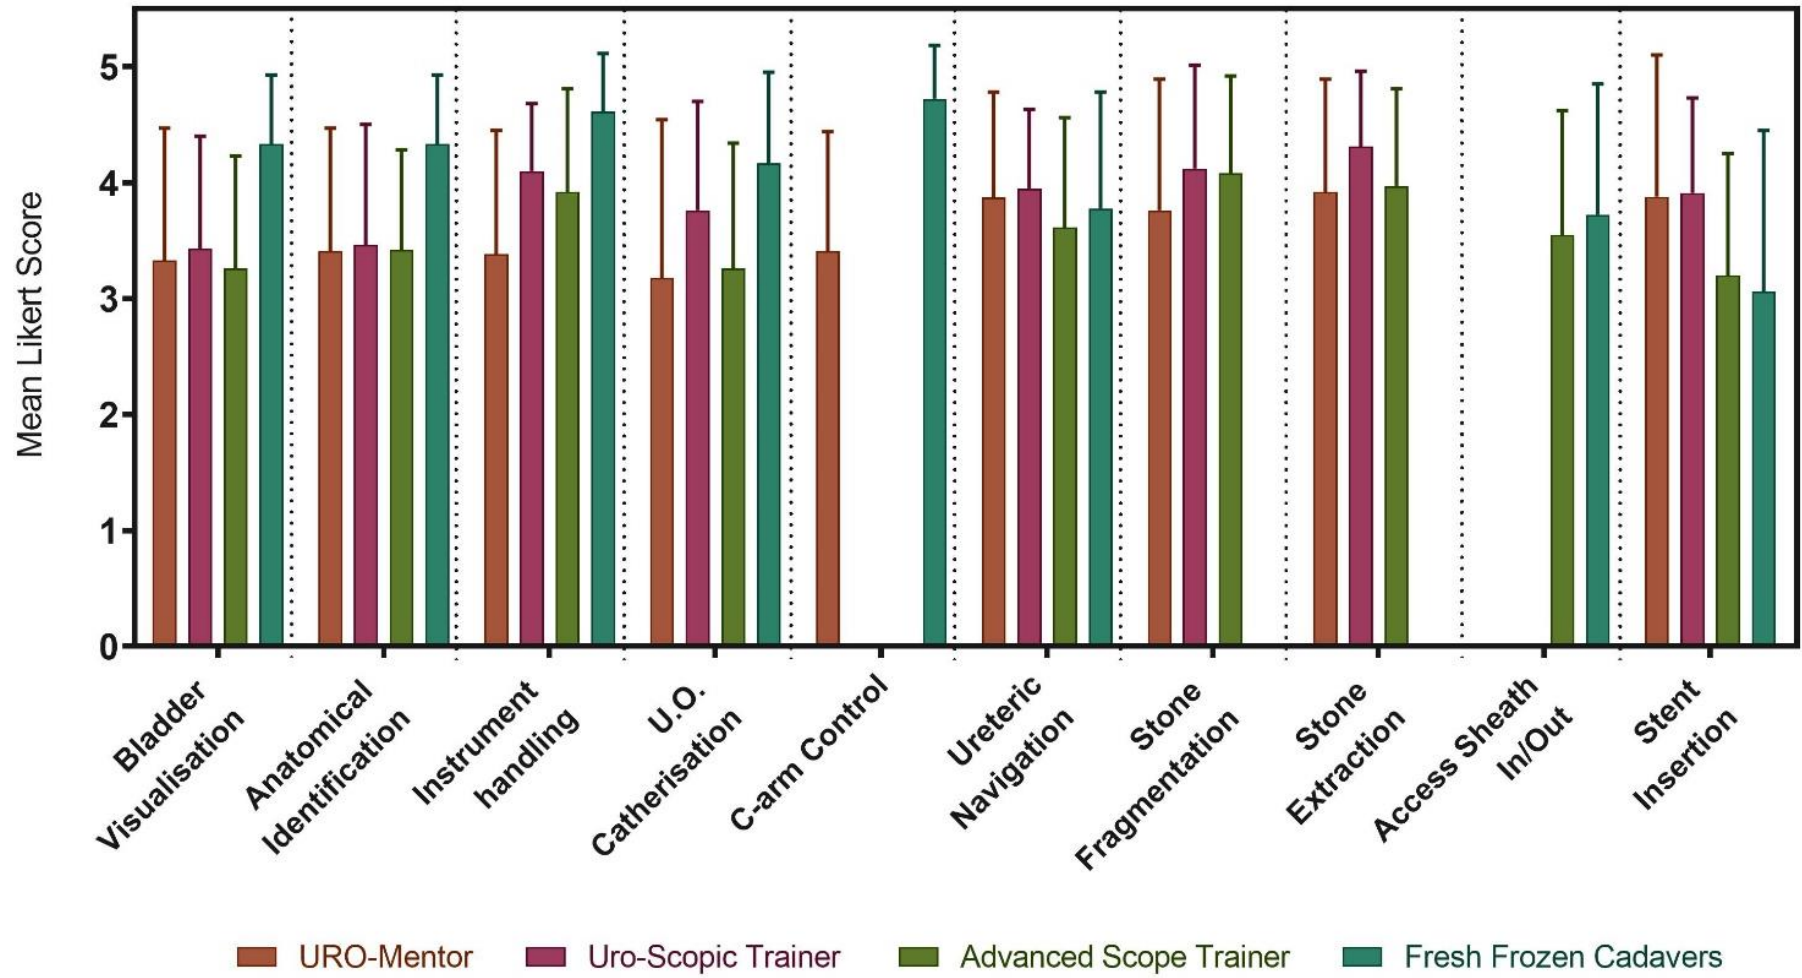

Supplement: MOESM1 [file 18829632]
