# Supplementary material for: The SIMULATE ureteroscopy training curriculum: educational value and transfer of skills
Source: Springer Nature journal article supplement (doi:10.1007/s00345-021-03604-w), 2021-02-03
Supplement: MOESM2 [file 18829632]

## SIMULATE Evaluation Questionnaire

-Your responses will be processed anonymously-

Name: .....

Age: .....

Gender: M/F

Clinical Experience:

Resident/Trainee – stage of training:

Consultant – years of independent practice:

Please indicate the **number of times** you have independently performed the following procedures:

| Procedures                       | No. of times |
|----------------------------------|--------------|
| <b>Rigid cystoscopy</b>          |              |
| <b>Flexible cystoscopy</b>       |              |
| <b>Semi-rigid Ureteroscopy</b>   |              |
| <b>Flexible Ureterorenoscopy</b> |              |

How useful were the following **lectures**?

1. Initial theatre set up, ureteric access and retrograde studies
2. Guidewires, access sheaths, stents & baskets
3. Lasers – types, size, settings & safety
4. Semi-rigid ureteroscopy
5. Flexible ureterorenoscopy

(1-not useful, 5-very useful)

- |                            |                            |                            |                            |                            |
|----------------------------|----------------------------|----------------------------|----------------------------|----------------------------|
| 1 <input type="checkbox"/> | 2 <input type="checkbox"/> | 3 <input type="checkbox"/> | 4 <input type="checkbox"/> | 5 <input type="checkbox"/> |
| 1 <input type="checkbox"/> | 2 <input type="checkbox"/> | 3 <input type="checkbox"/> | 4 <input type="checkbox"/> | 5 <input type="checkbox"/> |
| 1 <input type="checkbox"/> | 2 <input type="checkbox"/> | 3 <input type="checkbox"/> | 4 <input type="checkbox"/> | 5 <input type="checkbox"/> |
| 1 <input type="checkbox"/> | 2 <input type="checkbox"/> | 3 <input type="checkbox"/> | 4 <input type="checkbox"/> | 5 <input type="checkbox"/> |
| 1 <input type="checkbox"/> | 2 <input type="checkbox"/> | 3 <input type="checkbox"/> | 4 <input type="checkbox"/> | 5 <input type="checkbox"/> |

Comments: .....

.....

.....

How useful was the **URO-Mentor VR Sim** in teaching the following: (1-not useful, 5-very useful)

- |                                       |   |   |   |   |   |
|---------------------------------------|---|---|---|---|---|
| 1. Bladder Visualisation (Cystoscopy) | 1 | 2 | 3 | 4 | 5 |
| 2. Anatomical Identification          | 1 | 2 | 3 | 4 | 5 |
| 3. Instrument handling                | 1 | 2 | 3 | 4 | 5 |
| 4. Ureteric Orifice Catheterisation   | 1 | 2 | 3 | 4 | 5 |
| 5. C-arm Control                      | 1 | 2 | 3 | 4 | 5 |
| 6. Ureteric Navigation                | 1 | 2 | 3 | 4 | 5 |
| 7. Stone Fragmentation                | 1 | 2 | 3 | 4 | 5 |
| 8. Stone Extraction                   | 1 | 2 | 3 | 4 | 5 |
| 9. Stent Insertion                    | 1 | 2 | 3 | 4 | 5 |

Comments: .....

.....

.....

How useful was the **Uro-Scopic Trainer** in teaching the following: (1-not useful, 5-very useful)

- |                                       |   |   |   |   |   |
|---------------------------------------|---|---|---|---|---|
| 1. Bladder Visualisation (Cystoscopy) | 1 | 2 | 3 | 4 | 5 |
| 2. Anatomical Identification          | 1 | 2 | 3 | 4 | 5 |
| 3. Instrument handling                | 1 | 2 | 3 | 4 | 5 |
| 4. Ureteric Orifice Catheterisation   | 1 | 2 | 3 | 4 | 5 |
| 5. Ureteric Navigation                | 1 | 2 | 3 | 4 | 5 |
| 6. Laser Stone Fragmentation          | 1 | 2 | 3 | 4 | 5 |
| 7. Stone Extraction                   | 1 | 2 | 3 | 4 | 5 |
| 8. Stent Insertion                    | 1 | 2 | 3 | 4 | 5 |

Comments: .....

.....

.....

How useful was the **Scope/Adv. Scope Trainer** in teaching the following: (1-not useful, 5-very useful)

- |                                       |   |   |   |   |   |
|---------------------------------------|---|---|---|---|---|
| 1. Bladder Visualisation (Cystoscopy) | 1 | 2 | 3 | 4 | 5 |
| 2. Anatomical Identification          | 1 | 2 | 3 | 4 | 5 |
| 3. Instrument handling                | 1 | 2 | 3 | 4 | 5 |
| 4. Ureteric Orifice Catheterisation   | 1 | 2 | 3 | 4 | 5 |
| 5. Insertion/Removal of Access Sheath | 1 | 2 | 3 | 4 | 5 |
| 6. Ureteric Navigation                | 1 | 2 | 3 | 4 | 5 |
| 7. Laser Stone Fragmentation          | 1 | 2 | 3 | 4 | 5 |
| 8. Stone Extraction                   | 1 | 2 | 3 | 4 | 5 |
| 9. Stent Insertion                    | 1 | 2 | 3 | 4 | 5 |

Comments: .....

.....

.....

How useful was the **Cadaveric Simulation** in teaching the following: (1-least useful, 5-very useful)

- |                                       |                            |                            |                            |                            |                            |
|---------------------------------------|----------------------------|----------------------------|----------------------------|----------------------------|----------------------------|
| 1. Bladder Visualisation (Cystoscopy) | 1 <input type="checkbox"/> | 2 <input type="checkbox"/> | 3 <input type="checkbox"/> | 4 <input type="checkbox"/> | 5 <input type="checkbox"/> |
| 2. Anatomical Identification          | 1 <input type="checkbox"/> | 2 <input type="checkbox"/> | 3 <input type="checkbox"/> | 4 <input type="checkbox"/> | 5 <input type="checkbox"/> |
| 3. Instrument handling                | 1 <input type="checkbox"/> | 2 <input type="checkbox"/> | 3 <input type="checkbox"/> | 4 <input type="checkbox"/> | 5 <input type="checkbox"/> |
| 4. Ureteric Orifice Catheterisation   | 1 <input type="checkbox"/> | 2 <input type="checkbox"/> | 3 <input type="checkbox"/> | 4 <input type="checkbox"/> | 5 <input type="checkbox"/> |
| 5. C-arm Control                      | 1 <input type="checkbox"/> | 2 <input type="checkbox"/> | 3 <input type="checkbox"/> | 4 <input type="checkbox"/> | 5 <input type="checkbox"/> |
| 6. Insertion/Removal of Access Sheath | 1 <input type="checkbox"/> | 2 <input type="checkbox"/> | 3 <input type="checkbox"/> | 4 <input type="checkbox"/> | 5 <input type="checkbox"/> |
| 7. Ureteric Navigation                | 1 <input type="checkbox"/> | 2 <input type="checkbox"/> | 3 <input type="checkbox"/> | 4 <input type="checkbox"/> | 5 <input type="checkbox"/> |
| 8. Stent Insertion                    | 1 <input type="checkbox"/> | 2 <input type="checkbox"/> | 3 <input type="checkbox"/> | 4 <input type="checkbox"/> | 5 <input type="checkbox"/> |

Comments: .....

.....

.....

(1=strongly disagree, 5=strongly agree)

- |                                                                                  |                            |                            |                            |                            |                            |
|----------------------------------------------------------------------------------|----------------------------|----------------------------|----------------------------|----------------------------|----------------------------|
| This training has significantly improved my skills:                              | 1 <input type="checkbox"/> | 2 <input type="checkbox"/> | 3 <input type="checkbox"/> | 4 <input type="checkbox"/> | 5 <input type="checkbox"/> |
| I have gained transferrable skills for the operating room:                       | 1 <input type="checkbox"/> | 2 <input type="checkbox"/> | 3 <input type="checkbox"/> | 4 <input type="checkbox"/> | 5 <input type="checkbox"/> |
| I felt the course was very productive and enjoyable:                             | 1 <input type="checkbox"/> | 2 <input type="checkbox"/> | 3 <input type="checkbox"/> | 4 <input type="checkbox"/> | 5 <input type="checkbox"/> |
| Simulation-based training and assessment is essential for patient safety:        | 1 <input type="checkbox"/> | 2 <input type="checkbox"/> | 3 <input type="checkbox"/> | 4 <input type="checkbox"/> | 5 <input type="checkbox"/> |
| There is a role for further procedural simulation curricula in urology training: | 1 <input type="checkbox"/> | 2 <input type="checkbox"/> | 3 <input type="checkbox"/> | 4 <input type="checkbox"/> | 5 <input type="checkbox"/> |

Any other Comments:

.....

.....

.....

.....

**Thank you for your kind participation!**
